# Supplementary material
Source: Springer Nature journal article supplement (https://www.springermedizin.de/resource/supplementary/12879_2011_2071_MOESM3_ESM.pdf/9443634)
Supplement: MOESM3 [file 9443634]

Additonal file 3. Outcome of the children hospitalized with severe pneumonia, Eastern Visayas Regional Medical Center, May 2008 to May 2009

|                                   | Died        | Discharged<br>against<br>medical<br>advice-<br>Deteriorated | Discharged<br>against<br>medical<br>advice-<br>Improved | Discharged   | Othres     | Total |
|-----------------------------------|-------------|-------------------------------------------------------------|---------------------------------------------------------|--------------|------------|-------|
| Flu A                             | 3<br>25.0%  | 1<br>8.3%                                                   | 2<br>16.7%                                              | 6<br>50.0%   | 0<br>0.0%  | 12    |
| Flu B                             | 0<br>0.0%   | 0<br>0.0%                                                   | 3<br>100.0%                                             | 0<br>0.0%    | 0<br>0.0%  | 3     |
| RSV-A                             | 10<br>6.3%  | 2<br>1.3%                                                   | 28<br>17.5%                                             | 117<br>73.1% | 3<br>1.9%  | 160   |
| RSV-B                             | 0<br>0.0%   | 1<br>20.0%                                                  | 1<br>20.0%                                              | 3<br>60.0%   | 0<br>0.0%  | 5     |
| hMPV                              | 1<br>5.9%   | 0<br>0.0%                                                   | 3<br>17.6%                                              | 12<br>70.6%  | 1<br>5.9%  | 17    |
| PIVs                              | 0<br>0.0%   | 0<br>0.0%                                                   | 2<br>25.0%                                              | 6<br>75.0%   | 0<br>0.0%  | 8     |
| HRV-A                             | 12<br>12.2% | 2<br>2.0%                                                   | 13<br>13.3%                                             | 67<br>68.4%  | 4<br>4.1%  | 98    |
| HRV-B                             | 2<br>11.8%  | 0<br>0.0%                                                   | 3<br>17.6%                                              | 12<br>70.6%  | 0<br>0.0%  | 17    |
| HRV-C                             | 3<br>4.2%   | 1<br>1.4%                                                   | 13<br>18.3%                                             | 50<br>70.4%  | 4<br>5.6%  | 71    |
| HCoV-OC43                         | 1<br>100.0% | 0<br>0.0%                                                   | 0<br>0.0%                                               | 0<br>0.0%    | 0<br>0.0%  | 1     |
| HCoV-NL63                         | 0<br>0.0%   | 1<br>100.0%                                                 | 0<br>0.0%                                               | 0<br>0.0%    | 0<br>0.0%  | 1     |
| AdVs                              | 1<br>6.7%   | 2<br>13.3%                                                  | 4<br>26.7%                                              | 8<br>53.3%   | 0<br>0.0%  | 15    |
| HBoV                              | 0<br>0.0%   | 0<br>0.0%                                                   | 0<br>0.0%                                               | 2<br>100.0%  | 0<br>0.0%  | 2     |
| WUV                               | 0<br>0.0%   | 0<br>0.0%                                                   | 2<br>22.2%                                              | 6<br>66.7%   | 1<br>11.1% | 9     |
| KIV                               | 0<br>0.0%   | 0<br>0.0%                                                   | 0<br>0.0%                                               | 1<br>100.0%  | 0<br>0.0%  | 1     |
| Single Virus<br>Positive          | 33<br>7.9%  | 10<br>2.4%                                                  | 74<br>17.6%                                             | 290<br>69.0% | 13<br>3.1% | 420   |
| Double Triple<br>Viruses Positive | 2<br>2.6%   | 1<br>1.3%                                                   | 19<br>24.4%                                             | 53<br>67.9%  | 3<br>3.8%  | 78    |
| Non-virus                         | 35<br>10.9% | 7<br>2.2%                                                   | 58<br>18.1%                                             | 207<br>64.5% | 14<br>4.4% | 321   |
| Total Population                  | 70<br>8.5%  | 18<br>2.2%                                                  | 151<br>18.4%                                            | 550<br>67.2% | 29<br>3.5% | 819   |

Flu indicates influenza virus; RSV, respiratory syncytial virus; hMPV, human metapneumovirus; PIVs, parainfluenza virus; HRV, human rhinovirus; HCoV, human coronavirus; AdV, adenoviruses; HBoV, human bovine coronavirus; WUV, human WU polyomavirus; KIV; human KI polyomavirus
